# Supplementary material for: Local electrochemical sample acidification for the detection of Pb2+ traces
Source: Royal Society of Chemistry journal article supplement (doi:10.1039/d4an00647j), 2024-01-01
Supplement: d4an00647j1.pdf [file d4an00647j1.pdf]

## Supplementary information

### Local Electrochemical Sample Acidification for the Detection of Pb<sup>2+</sup>

#### Traces

Amira Mahmoud, Julius Gajdár, Mariela Brites Helú, Mathieu Etienne, Grégoire Herzog\*

Université de Lorraine, CNRS, LCPME, F-54000 Nancy, France.

Corresponding author: [gregoire.herzog@cnrs.fr](mailto:gregoire.herzog@cnrs.fr)

|                                                                                  |   |
|----------------------------------------------------------------------------------|---|
| Stability of pseudo reference electrode potential vs different pH levels .....   | 2 |
| pH determination using gold oxide reduction potential.....                       | 2 |
| Influence of time on the acidification process .....                             | 3 |
| Effects of pH on lead detection .....                                            | 3 |
| Repetitions of SWVs for 100 ppb Pb <sup>2+</sup> without regeneration step ..... | 4 |
| Cyclic voltammetry of Pt in 0.1 M NaNO <sub>3</sub> .....                        | 4 |
| Impact of copper interference in anodic stripping voltammetry .....              | 5 |

## Stability of pseudo reference electrode potential vs different pH levels

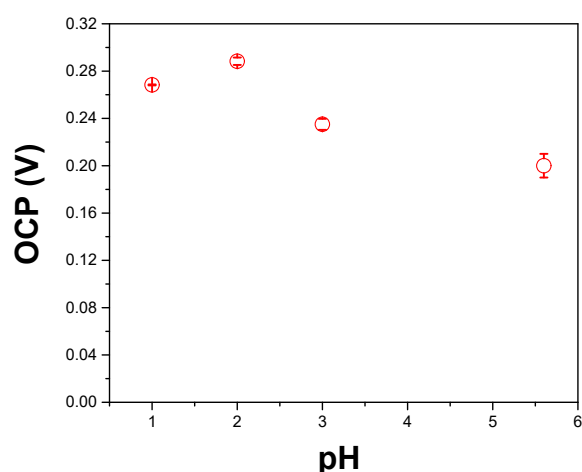

**Fig S1.** Open Circuit Potential (OCP) measurements of the pseudo reference electrode at various pH (1; 2; 3 and 5.6)

## pH determination using gold oxide reduction potential

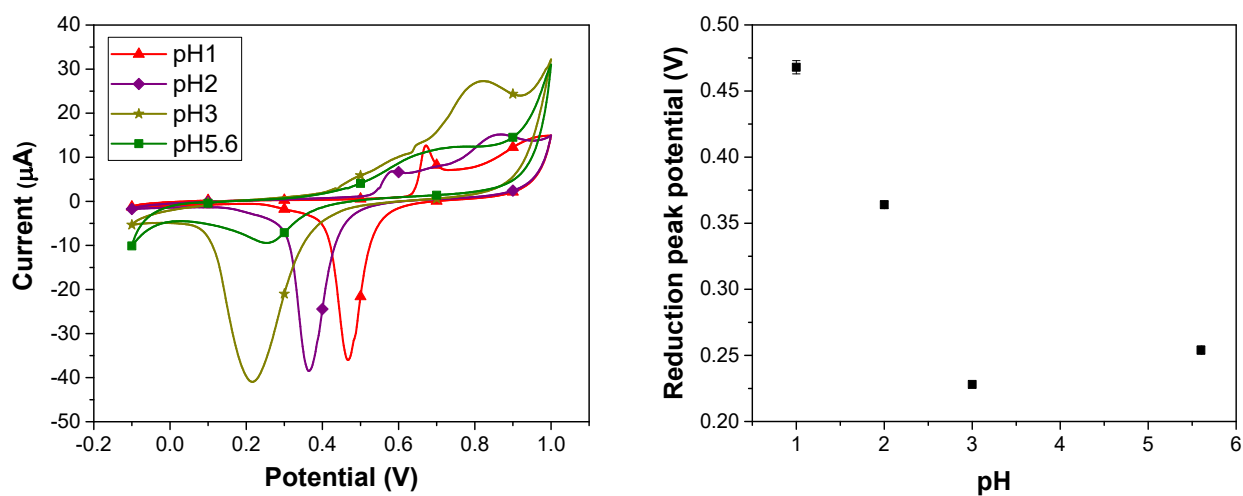

**Fig S2.** (A) Cyclic voltammogram of the gold electrode obtained at different pH (0.1 M  $\text{HNO}_3$  (pH 1), 0.01 M  $\text{HNO}_3$ +0.1M  $\text{NaNO}_3$  (pH 2), 0.001 M  $\text{HNO}_3$ +0.1M  $\text{NaNO}_3$  (pH 3), 0.1 M  $\text{NaNO}_3$  (pH 5.6)). Scan rate 50  $\text{mV s}^{-1}$ . (B) Influence of pH on the peak for the reduction of gold oxide.

## Influence of time on the acidification process

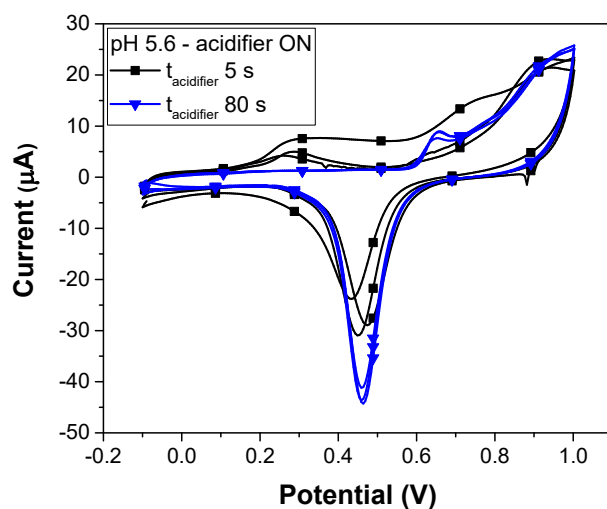

**Fig S3.** Cyclic voltammogram of the gold electrode obtained in 0.1 M  $\text{NaNO}_3$  (pH 5.6) solution, after applying the optimized acidified potential ( $E_{\text{acidifier}}$  of 1.2 V) in different time ( $t_{\text{acidifier}}$  of 5 s and 80 s).  $N = 3$  for each  $t_{\text{acidifier}}$  condition. Scan rate  $50 \text{ mV s}^{-1}$

## Effects of pH on lead detection

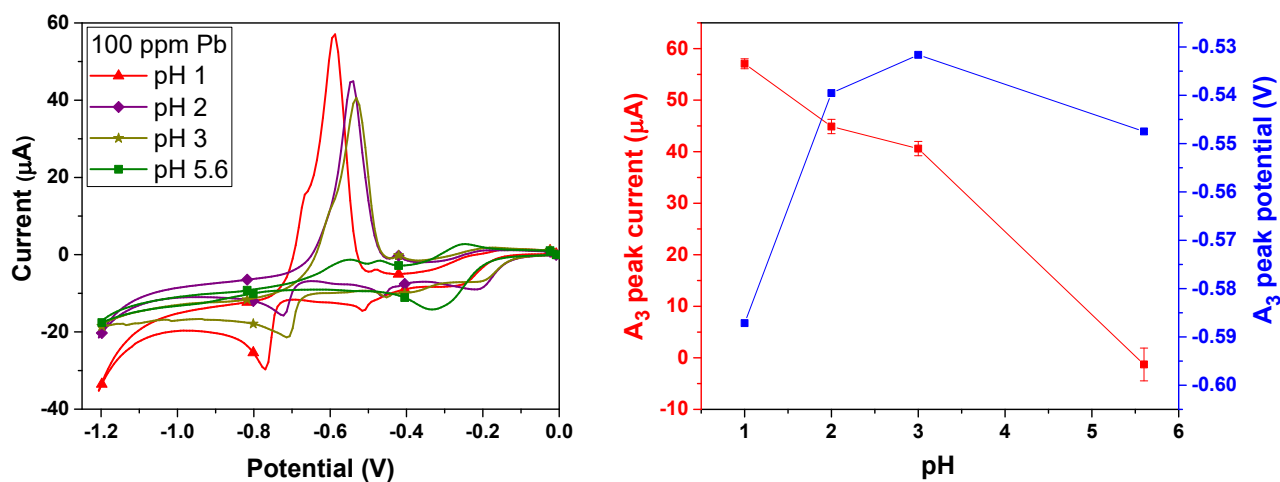

**Fig S4.** (A) Cyclic voltammograms obtained for a lead concentration of 100 ppm in different pHs (0.1 M  $\text{HNO}_3$  (pH 1), 0.01 M  $\text{HNO}_3$ +0.1 M  $\text{NaNO}_3$  (pH 2), 0.001 M  $\text{HNO}_3$  + 0.1 M  $\text{NaNO}_3$  (pH 3), 0.1 M  $\text{NaNO}_3$  (pH 5.6)). Scan rate 50 mV/s. (B) Influence of pH on the  $A_3$  peak anodic stripping of lead.

### Repetitions of SWVs for 100 ppb Pb<sup>2+</sup> without regeneration step

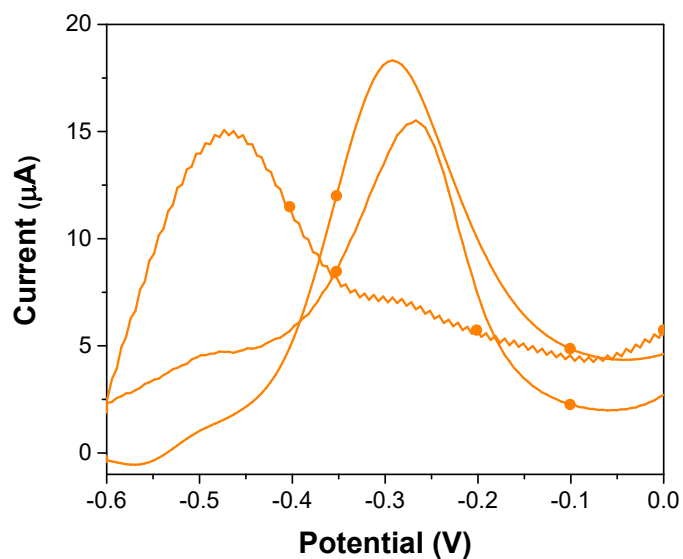

**Fig S5.** Three consecutive SWVs of 100 ppb Pb<sup>2+</sup> tested three time in the same conditions (0.1 M NaNO<sub>3</sub> (pH 5.6) with the acidifier switch on, without regeneration step.

### Cyclic voltammetry of Pt in 0.1 M NaNO<sub>3</sub>

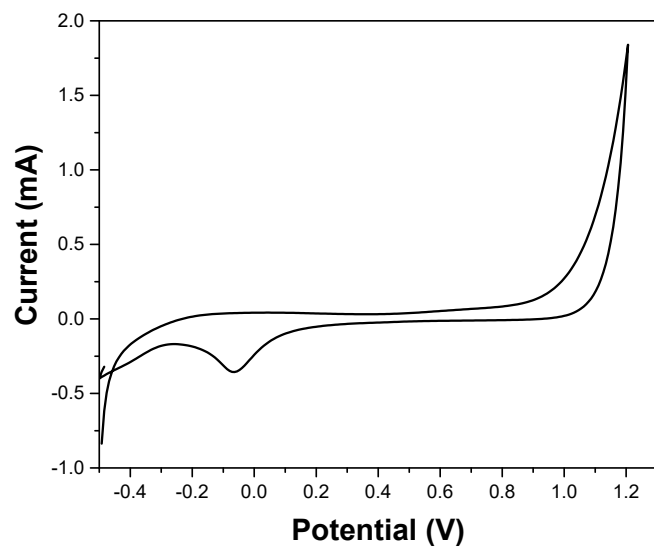

**Fig S6.** Cyclic voltammogram on the platinum grid obtained in 0.1 M NaNO<sub>3</sub> solution. Scan rate 100 mV s<sup>-1</sup>

## Impact of copper interference in anodic stripping voltammetry

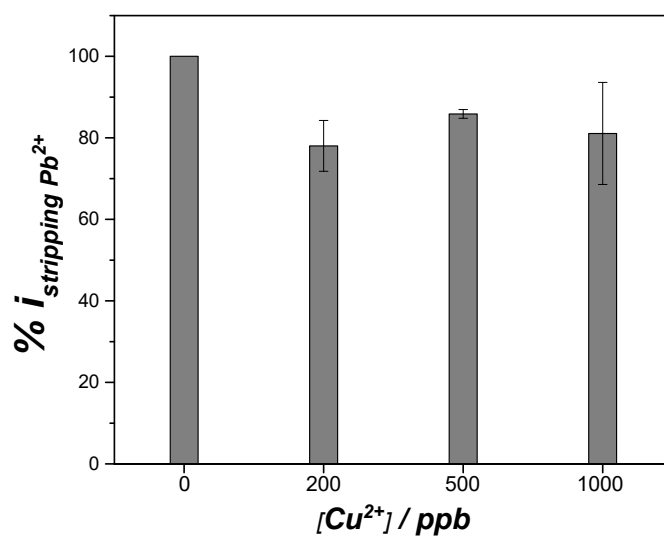

**Fig S7.** Effect of Cu<sup>2+</sup> concentration on the stripping current percentage of Pb<sup>2+</sup>: result obtained by SWV of 100 ppb Pb<sup>2+</sup> in the absence and in the presence of 200; 500 and 1000 ppb of Cu<sup>2+</sup> (*N* = 3) tested 0.1 M NaNO<sub>3</sub> (pH 5.6) with the acidifier switch on
